# Supplementary material
Source: MDPI journal article supplement (https://www.mdpi.com/1424-2818/13/6/267)
Supplement: s1 [file s1]

# Acronyms Genera and Species

|          |                                                                 |
|----------|-----------------------------------------------------------------|
| 1Acaang  | <i>Acaciella angustissima</i> (Mill.) Britton & Rose            |
| 1Acapai  | <i>Acaciella painteri</i> Britton & Rose                        |
| 1Acateq  | <i>Acaciella tequilana</i> (S. Watson) Britton & Rose           |
| 1Acavil  | <i>Acaciella villosa</i> (Sw.) Britton & Rose                   |
| 1Albleu  | <i>Albizia leucocalyx</i> (Britton & Rose) L. Rico              |
| 1Albnio  | <i>Albizia niopoides</i> (Spruce ex Benth.) Burkart             |
| 1Albsin  | <i>Albizia sinaloensis</i> Britton & Rose                       |
| 1Albtom  | <i>Albizia tomentosa</i> (Micheli) Standl.                      |
| 1Calcal  | <i>Calliandra californica</i> Benth.                            |
| 1Calcalo | <i>Calliandra calothyrsus</i> Meisn.                            |
| 1Calcan  | <i>Calliandra canescens</i> (Schltdl. & Cham.) Benth.           |
| 1Caleri  | <i>Calliandra eriophylla</i> Benth.                             |
| 1Calgra  | <i>Calliandra grandiflora</i> (L'Hér.) Benth.                   |
| 1Calhir  | <i>Calliandra hirsuta</i> (G. Don) Benth.                       |
| 1Calhou  | <i>Calliandra houstoniana</i> (Mill.) Standl.                   |
| 1Caljuz  | <i>Calliandra juzepczukii</i> Standl.                           |
| 1Callae  | <i>Calliandra laevis</i> Rose                                   |
| 1Cnervo  | <i>Calliandropsis nervosa</i> (Urb.) Urb. & Ekman               |
| 1Calter  | <i>Calliandra tergemina</i> (L.) Benth.                         |
| 1Cashin  | <i>Cassia hintonii</i> Sandwith                                 |
| 1Casmos  | <i>Cassia moschata</i> Kunth                                    |
| 1Chacha  | <i>Chamaecrista chamaecristoides</i> (Collad.) Greene           |
| 1Chadip  | <i>Chamaecrista diphylla</i> (L.) Greene                        |
| 1Chafag  | <i>Chamaecrista fagonioides</i> (Vogel) H.S. Irwin & Barneby    |
| 1Chafle  | <i>Chamaecrista flexuosa</i> (L.) Greene                        |
| 1Chagla  | <i>Chamaecrista glandulosa</i> (L.) Greene                      |
| 1Chagre  | <i>Chamaecrista greggii</i> (A. Gray) Pollard ex A. Heller      |
| 1Chahis  | <i>Chamaecrista hispidula</i> (Vahl) H.S. Irwin & Barneby       |
| 1Chanic  | <i>Chamaecrista nictitans</i> (L.) Moench                       |
| 1Charuf  | <i>Chamaecrista rufa</i> (M. Martens & Galeotti) Britton & Rose |
| 1Chlman  | <i>Chloroleucon mangense</i> (Jacq.) Britton & Rose             |
| 1Cojarb  | <i>Cojoba arborea</i> (L.) Britton & Rose                       |
| 1Cojrec  | <i>Cojoba recordii</i> Britton & Rose                           |
| 1Conmul  | <i>Conzattia multiflora</i> (B.L. Rob.) Standl.                 |
| 1Coulmol | <i>Coulteria mollis</i> Kunth                                   |
| 1Coupla  | <i>Coulteria platyloba</i> (S. Watson) N. Zamora                |
| 1Desbal  | <i>Desmanthus balsensis</i> J.L. Contr.                         |
| 1Desbic  | <i>Desmanthus bicornutus</i> S. Watson                          |

|          |                                                                          |
|----------|--------------------------------------------------------------------------|
| 1Desfru  | <i>Desmanthus fruticosus</i> Rose                                        |
| 1Desmain | <i>Desmanthus interior</i> (Britton & Rose) Bullock                      |
| 1Despai  | <i>Desmanthus painteri</i> (Britton & Rose) Standl.                      |
| 1Despum  | <i>Desmanthus pumilus</i> (Schltdl.) J.F. Macbr.                         |
| 1Desvir  | <i>Desmanthus virgatus</i> (L.) Willd.                                   |
| 1Ebecon  | <i>Ebenopsis confinis</i> (Standl.) Britton & Rose                       |
| 1Ebeeba  | <i>Ebenopsis ebano</i> (Berland.) Barneby & J.W. Grimes                  |
| 1Enteyc  | <i>Enterolobium cyclocarpum</i> (Jacq.) Griseb.                          |
| 1Egigas  | <i>Entada gigas</i> (L.) Fawc. & Rendle                                  |
| 1Epolys  | <i>Entada polystachya</i> (L.) DC.                                       |
| 1Entsch  | <i>Enterolobium schomburgkii</i> (Benth.) Benth.                         |
| 1Eryexo  | <i>Erythrostemon exostemma</i> (DC.) Gagnon & G.P. Lewis                 |
| 1Eryhin  | <i>Erythrostemon hintonii</i> (Sandwith) Gagnon & G.P. Lewis             |
| 1Erymexi | <i>Erythrostemon mexicanus</i> (A. Gray) Gagnon & G.P. Lewis             |
| 1Eryyuc  | <i>Erythrostemon yucatanensis</i> (Greenm.) Gagnon & G.P. Lewis          |
| 1Guibon  | <i>Guilandina bonduc</i> L.                                              |
| 1Haebra  | <i>Haematoxylum brasiletto</i> H. Karst.                                 |
| 1Haecam  | <i>Haematoxylum campechianum</i> L.                                      |
| 1Havaca  | <i>Havardia acatensis</i> (Benth.) Britton & Rose                        |
| 1Havalb  | <i>Havardia albicans</i> (Kunth) Britton & Rose                          |
| 1Havcam  | <i>Havardia campylacantha</i> (L. Rico & M. Sousa) Barneby & J.W. Grimes |
| 1Havmex  | <i>Havardia mexicana</i> (Rose) Britton & Rose                           |
| 1Havpal  | <i>Havardia pallens</i> (Benth.) Britton & Rose                          |
| 1Havpla  | <i>Havardia platyloba</i> (Bertero ex DC.) Britton & Rose                |
| 1Havson  | <i>Havardia sonora</i> (S. Watson) Britton & Rose                        |
| 1Hesocc  | <i>Hesperalbizia occidentalis</i> (Brandege) Barneby & J.W. Grimes       |
| 1Hetscle | <i>Heteroflorum sclerocarpum</i> M. Sousa                                |
| 1Ingacr  | <i>Inga acrocephala</i> Steud.                                           |
| 1Ingbar  | <i>Inga barbourii</i> Standl.                                            |
| 1Ingbel  | <i>Inga belizensis</i> Standl.                                           |
| 1Ingeri  | <i>Inga eriocarpa</i> Benth.                                             |
| 1Ingjin  | <i>Inga jinicuil</i> Schltdl.                                            |
| 1Inglau  | <i>Inga laurina</i> (Sw.) Willd.                                         |
| 1Ingnob  | <i>Inga nobilis</i> Willd.                                               |
| 1Ingoer  | <i>Inga oerstediana</i> Benth. ex Seem.                                  |
| 1Ingpat  | <i>Inga paterno</i> Harms                                                |
| 1Ingpav  | <i>Inga pavoniana</i> G. Don                                             |
| 1Ingpin  | <i>Inga pinetorum</i> Pittier                                            |

|          |                                                                                 |          |                                                              |
|----------|---------------------------------------------------------------------------------|----------|--------------------------------------------------------------|
| 1Ingpun  | <i>Inga punctata</i> Willd.                                                     | 1Mimade  | <i>Mimosa adenantheroides</i> (M. Martens & Galeotti) Benth. |
| 1Ingsin  | <i>Inga sinacae</i> M. Sousa & Ibarra-Manr.                                     | 1Mimaff  | <i>Mimosa affinis</i> B.L. Rob.                              |
| 1IngTue  | <i>Inga tuerckheimii</i> Pittier                                                | 1Mimalb  | <i>Mimosa albida</i> Humb. & Bonpl. ex Willd.                |
| 1Ingver  | <i>Inga vera</i> Willd.                                                         | 1Mimare  | <i>Mimosa arenosa</i> (Willd.) Poir.                         |
| 1Ingxal  | <i>Inga xalapensis</i> Benth.                                                   | 1Mimbah  | <i>Mimosa bahamensis</i> Benth.                              |
| 1Lachvir | <i>Lachesiodendron viridiflorum</i> (Kunth) P.G. Ribeiro, L.P. Queiroz & Luckow | 1Mimben  | <i>Mimosa benthamii</i> J.F. Macbr.                          |
| 1Leucol  | <i>Leucaena collinsii</i> Britton & Rose                                        | 1Mimbiu  | <i>Mimosa biuncifera</i> Benth.                              |
| 1Leucon  | <i>Leucaena confertiflora</i> Zárate                                            | 1Mimbre  | <i>Mimosa brevispicata</i> Britton                           |
| 1Leucus  | <i>Leucaena cuspidata</i> Standl.                                               | 1Mimcal  | <i>Mimosa calcicola</i> B.L. Rob.                            |
| 1Leudiv  | <i>Leucaena diversifolia</i> (Schltdl.) Benth.                                  | 1Mimdep  | <i>Mimosa depauperata</i> Benth.                             |
| 1Leuesc  | <i>Leucaena esculenta</i> (DC.) Benth.                                          | 1Mimdip  | <i>Mimosa diplotricha</i> C. Wright                          |
| 1Leulan  | <i>Leucaena lanceolata</i> S. Watson                                            | 1Mimegr  | <i>Mimosa egregia</i> Sandwith                               |
| 1Leuleu  | <i>Leucaena leucocephala</i> (Lam.) de Wit                                      | 1Mimeur  | <i>Mimosa eurycarpa</i> B.L. Rob.                            |
| 1Leumac  | <i>Leucaena macrophylla</i> Benth.                                              | 1Mimgal  | <i>Mimosa galeottii</i> Benth.                               |
| 1Leumat  | <i>Leucaena matudae</i> (Zárate) C.E. Hughes                                    | 1Mimgol  | <i>Mimosa goldmanii</i> B.L. Rob.                            |
| 1Leupal  | <i>Leucaena pallida</i> Britton & Rose                                          | 1Mimgra  | <i>Mimosa grahamii</i> A. Gray                               |
| 1Leupue  | <i>Leucaena pueblana</i> Britton & Rose                                         | 1Mimgua  | <i>Mimosa guatemalensis</i> (Hook. & Arn.) Benth.            |
| 1Leupul  | <i>Leucaena pulverulenta</i> (Schltdl.) Benth.                                  | 1Mimlac  | <i>Mimosa lacerata</i> Rose                                  |
| 1Leusha  | <i>Leucaena shannonii</i> Donn. Sm.                                             | 1Mimlact | <i>Mimosa lactiflua</i> Delile ex Benth.                     |
| 1Leutri  | <i>Leucaena trichandra</i> (Zucc.) Urb.                                         | 1Mimlui  | <i>Mimosa luisana</i> Brandegee                              |
| 1Libcor  | <i>Libidibia coriaria</i> (Jacq.) Schltdl.                                      | 1Mimmal  | <i>Mimosa malacophylla</i> A. Gray                           |
| 1Libscl  | <i>Libidibia sclerocarpa</i> (Standl.) Britton & Rose                           | 1Mimmar  | <i>Mimosa margaritae</i> Rose                                |
| 1Lysaca  | <i>Lysiloma acapulcense</i> (Kunth) Benth.                                      | 1Mimmol  | <i>Mimosa mollis</i> Benth.                                  |
| 1Lysaur  | <i>Lysiloma auritum</i> (Schltdl.) Benth.                                       | 1Mimmon  | <i>Mimosa monancistra</i> Benth.                             |
| 1Lysdiv  | <i>Lysiloma divaricatum</i> (Jacq.) J.F. Macbr.                                 | 1Mimpig  | <i>Mimosa pigra</i> L.                                       |
| 1Lyslat  | <i>Lysiloma latisiliquum</i> (L.) Benth.                                        | 1Mimpal  | <i>Mimosa palmeri</i> Rose                                   |
| 1Lysmic  | <i>Lysiloma microphyllum</i> Benth.                                             | 1Mimpol  | <i>Mimosa polyantha</i> Benth.                               |
| 1Lyster  | <i>Lysiloma tergeminum</i> Benth.                                               | 1Mimpur  | <i>Mimosa purpurascens</i> B.L. Rob.                         |
| 1Lyswat  | <i>Lysiloma watsonii</i> Rose                                                   | 1Mimrec  | <i>Mimosa recordii</i> Britton & Rose                        |
| 1Maraca  | <i>Mariosousa acatlensis</i> (Benth.) Seigler & Ebinger                         | 1Mimrob  | <i>Mimosa robusta</i> R. Grether                             |
| 1Marcou  | <i>Mariosousa coulteri</i> (Benth.) Seigler & Ebinger                           | 1Mimsim  | <i>Mimosa similis</i> Britton & Rose                         |
| 1Mardol  | <i>Mariosousa dolichostachya</i> (S.F. Blake) Seigler & Ebinger                 | 1Mimten  | <i>Mimosa tenuiflora</i> (Willd.) Poir.                      |
| 1Marmam  | <i>Mariosousa mammifera</i> (Schltdl.) Seigler & Ebinger                        | 1Mimtex  | <i>Mimosa texana</i> (A. Gray) Small                         |
| 1Marser  | <i>Mariosousa sericea</i> (M. Martens & Galeotti) Seigler & Ebinger             | 1Mimtri  | <i>Mimosa tricephala</i> Schltdl. & Cham.                    |
| 1Marusu  | <i>Mariosousa usumacintensis</i> (Lundell) Seigler & Ebinger                    | 1Paracu  | <i>Parkinsonia aculeata</i> L.                               |
| 1Marwil  | <i>Mariosousa willardiana</i> (Rose) Seigler & Ebinger                          | 1Parcar  | <i>Parkinsonia carterae</i> Hawkins                          |
| 1Micfoe  | <i>Microlobius foetidus</i> (Jacq.) M. Sousa & G. Andrade                       | 1Parmic  | <i>Parkinsonia microphylla</i> Torr.                         |
| 1Mimaca  | <i>Mimosa acantholoba</i> (Humb. & Bonpl. ex Willd.) Poir.                      | 1Parpra  | <i>Parkinsonia praecox</i> (Ruiz & Pav. ex Hook.) Hawkins    |
| 1Mimacu  | <i>Mimosa aculeaticarpa</i> Ortega                                              | 1Partex  | <i>Parkinsonia texana</i> (A. Gray) S. Watson                |
|          |                                                                                 | 1Pipfla  | <i>Piptadenia flava</i> (Spreng. ex DC.) Benth.              |
|          |                                                                                 | 1Pitdul  | <i>Pithecellobium dulce</i> (Roxb.) Benth.                   |

|         |                                                                         |         |                                                                         |
|---------|-------------------------------------------------------------------------|---------|-------------------------------------------------------------------------|
| 1Pithym | <i>Pithecellobium hymenaeifolium</i> (Humb. & Bonpl. ex Willd.) Benth.  | 1Senmol | <i>Senna mollissima</i> (Humb. & Bonpl. ex Willd.) H.S. Irwin & Barneby |
| 1Pitkey | <i>Pithecellobium keyense</i> Britton                                   | 1Senmul | <i>Senna multijuga</i> (Rich.) H.S. Irwin & Barneby                     |
| 1Pitlan | <i>Pithecellobium lanceolatum</i> (Humb. & Bonpl. ex Willd.) Benth.     | 1Senobt | <i>Senna obtusifolia</i> (L.) H.S. Irwin & Barneby                      |
| 1Pitmac | <i>Pithecellobium macrandrium</i> Donn. Sm.                             | 1Senocc | <i>Senna occidentalis</i> (L.) Link                                     |
| 1Pitobl | <i>Pithecellobium oblongum</i> Benth.                                   | 1Senpal | <i>Senna pallida</i> (Vahl) H.S. Irwin & Barneby                        |
| 1Pobliq | <i>Pityrocarpa obliqua</i> (Pers.) Brenan                               | 1Senpap | <i>Senna papillosa</i> (Britton & Rose) H.S. Irwin & Barneby            |
| 1Pitsel | <i>Pithecellobium seleri</i> Harms                                      | 1Senpen | <i>Senna pendula</i> (Humb. & Bonpl. ex Willd.) H.S. Irwin & Barneby    |
| 1Pitung | <i>Pithecellobium unguis-cati</i> (L.) Benth.                           | 1Senper | <i>Senna peralteana</i> (Kunth) H.S. Irwin & Barneby                    |
| 1Pitwin | <i>Pithecellobium winzerlingii</i> Britton & Rose                       | 1Spicac | <i>Senegalia picachensis</i> (Brandege) Britton & Rose                  |
| 1Poieri | <i>Poincianella eriostachys</i> (Benth.) Britton & Rose                 | 1Spolyp | <i>Senegalia polyphylla</i> (DC.) Britton                               |
| 1Poigau | <i>Poincianella gaumeri</i> (Greenm.) Britton & Rose                    | 1Senqui | <i>Senna quinquangulata</i> (Rich.) H.S. Irwin & Barneby                |
| 1Progl  | <i>Prosopis glandulosa</i> Torr.                                        | 1Senrac | <i>Senna racemosa</i> (Mill.) H.S. Irwin & Barneby                      |
| 1Projul | <i>Prosopis juliflora</i> (Sw.) DC.                                     | 1Senret | <i>Senna reticulata</i> (Willd.) H.S. Irwin & Barneby                   |
| 1Prolae | <i>Prosopis laevigata</i> (Humb. & Bonpl. ex Willd.) M.C. Johnst.       | 1Sripar | <i>Senegalia riparia</i> (Kunth) Britton & Rose ex Britton & Killip     |
| 1Propal | <i>Prosopis palmeri</i> S. Watson                                       | 1Sensep | <i>Senna septemtrionalis</i> (Viv.) H.S. Irwin & Barneby                |
| 1Propub | <i>Prosopis pubescens</i> Benth.                                        | 1Senski | <i>Senna skinneri</i> (Benth.) H.S. Irwin & Barneby                     |
| 1Protam | <i>Prosopis tamaulipana</i> Burkart                                     | 1Ssuban | <i>Senegalia subangulata</i> (Rose) Britton & Rose                      |
| 1Provel | <i>Prosopis velutina</i> Wooton                                         | 1Stenui | <i>Senegalia tenuifolia</i> (L.) Britton & Rose                         |
| 1Psegua | <i>Pseudosamanea guachapele</i> (Kunth) Harms                           | 1Senuni | <i>Senna uniflora</i> (Mill.) H.S. Irwin & Barneby                      |
| 1Schpar | <i>Schizolobium parahyba</i> (Vell.) S.F. Blake                         | 1Senvil | <i>Senna villosa</i> (Mill.) H.S. Irwin & Barneby                       |
| 1Saniso | <i>Senegalia anisophylla</i> (S. Watson) Britton & Rose                 | 1Senwis | <i>Senna wislizeni</i> (A. Gray) H.S. Irwin & Barneby                   |
| 1Senato | <i>Senna atomaria</i> (L.) H.S. Irwin & Barneby                         | 1Tarcac | <i>Tara cacalaco</i> (Bonpl.) Molinari & Sánchez Och.                   |
| 1Senbau | <i>Senna bauhuinioides</i> (A. Gray) H.S. Irwin & Barneby               | 1Tarves | <i>Tara vesicaria</i> (L.) Molinari, Sánchez Och. & Mayta               |
| 1Sberla | <i>Senegalia berlandieri</i> (Benth.) Britton & Rose                    | 1Vacbil | <i>Vachellia bilimekii</i> (J.F. Macbr.) Seigler & Ebinger              |
| 1Sencob | <i>Senna cobanensis</i> (Britton) H.S. Irwin & Barneby                  | 1Vaccal | <i>Vachellia californica</i> (Brandege) Seigler & Ebinger               |
| 1Sendur | <i>Senna durangensis</i> (Rose) H.S. Irwin & Barneby                    | 1Vaccam | <i>Vachellia campechiana</i> (Mill.) Seigler & Ebinger                  |
| 1Senfoe | <i>Senna foetidissima</i> (Sessé & Moc. ex G. Don) H.S. Irwin & Barneby | 1Vaccol | <i>Vachellia collinsii</i> (Saff.) Seigler & Ebinger                    |
| 1Senfru | <i>Senna fruticosa</i> (Mill.) H.S. Irwin & Barneby                     | 1Vaccon | <i>Vachellia constricta</i> (Benth.) Seigler & Ebinger                  |
| 1Sengal | <i>Senna galeottiana</i> (M. Martens) H.S. Irwin & Barneby              | 1Vaccor | <i>Vachellia cornigera</i> (L.) Seigler & Ebinger                       |
| 1Sgaume | <i>Senegalia gaumeri</i> (S.F. Blake) Britton & Rose                    | 1Vacfar | <i>Vachellia farnesiana</i> (L.) Wight & Arn.                           |
| 1Sgregg | <i>Senegalia greggii</i> (A. Gray) Britton & Rose                       | 1Vacgen | <i>Vachellia gentlei</i> (Standl.) Seigler & Ebinger                    |
| 1Sengua | <i>Senna guatemalensis</i> (Donn. Sm.) H.S. Irwin & Barneby             | 1Vacgla | <i>Vachellia glandulifera</i> (S. Watson) Seigler & Ebinger             |
| 1Senhay | <i>Senna hayesiana</i> (Britton & Rose) H.S. Irwin & Barneby            | 1Vacglo | <i>Vachellia globulifera</i> (Saff.) Seigler & Ebinger                  |
| 1Senhir | <i>Senna hirsuta</i> (L.) H.S. Irwin & Barneby                          | 1Vachin | <i>Vachellia hindsii</i> (Benth.) Seigler & Ebinger                     |
| 1Senhol | <i>Senna holwayana</i> (Rose) H.S. Irwin & Barneby                      |         |                                                                         |
| 1Smacil | <i>Senegalia macilenta</i> (Rose) Britton & Rose                        |         |                                                                         |
| 1Smicra | <i>Senegalia micrantha</i> (Benth.) Britton & Rose                      |         |                                                                         |

|         |                                                                           |          |                                                                   |
|---------|---------------------------------------------------------------------------|----------|-------------------------------------------------------------------|
| 1Vacmac | <i>Vachellia macracantha</i> (Humb. & Bonpl. ex Willd.) Seigler & Ebinger | 5Broint  | <i>Brongniartia intermedia</i> Moric. ex Ser.                     |
| 1Vacmay | <i>Vachellia mayana</i> (Lundell) Seigler & Ebinger                       | 5Brolup  | <i>Brongniartia lupinoides</i> (Kunth) Taub.                      |
| 1Vacpen | <i>Vachellia pennatula</i> (Schltdl. & Cham.) Seigler & Ebinger           | 5Bropap  | <i>Brongniartia papyracea</i> Dorado & D.M. Arias                 |
| 1Vacpri | <i>Vachellia pringlei</i> (Rose) Seigler & Ebinger                        | 5Bropod  | <i>Brongniartia podalyrioides</i> Kunth                           |
| 1Vacsch | <i>Vachellia schaffneri</i> (S. Watson) Seigler & Ebinger                 | 5Calcae  | <i>Calopogonium caeruleum</i> (Benth.) C. Wright                  |
| 1Vacsph | <i>Vachellia sphaerocephala</i> (Cham. & Schltdl.) Seigler & Ebinger      | 5Calmuc  | <i>Calopogonium mucunoides</i> Desv.                              |
| 1Vacsta | <i>Vachellia x standleyi</i> (Saff.) Seigler & Ebinger                    | 5Canbra  | <i>Canavalia brasiliensis</i> Mart. ex Benth.                     |
| 1Zapfor | <i>Zapoteca formosa</i> (Kunth) H.M. Hern.                                | 5Cangla  | <i>Canavalia glabra</i> (M. Martens & Galeotti) J.D. Sauer        |
| 1Zaplam | <i>Zapoteca lambertiana</i> (G. Don) H.M. Hern.                           | 5Canros  | <i>Canavalia rosea</i> (Sw.) DC.                                  |
| 1Zappor | <i>Zapoteca portoricensis</i> (Jacq.) H.M. Hern.                          | 5Canvil  | <i>Canavalia villosa</i> Benth.                                   |
| 1Zaptet | <i>Zapoteca tetragona</i> (Willd.) H.M. Hern.                             | 5Cenmac  | <i>Centrosema macrocarpum</i> Benth.                              |
| 1Zygcog | <i>Zygia cognata</i> (Schltdl.) Britton & Rose                            | 5Cenmol  | <i>Centrosema molle</i> Mart. ex Benth.                           |
| 1Zyglat | <i>Zygia latifolia</i> (L.) Fawc. & Rendle                                | 5Cenplu  | <i>Centrosema plumieri</i> (Turpin ex Pers.) Benth.               |
| 1Zygpau | <i>Zygia paucijugata</i> (Lundell) L. Rico                                | 5Cenpub  | <i>Centrosema pubescens</i> Benth.                                |
| 1Zygpec | <i>Zygia peckii</i> (B.L. Rob.) Britton & Rose                            | 5Censag  | <i>Centrosema sagittatum</i> (Humb. & Bonpl. ex Willd.) Brandegee |
| 1Zygrec | <i>Zygia recordii</i> Britton & Rose                                      | 5Censch  | <i>Centrosema schottii</i> (Millsp.) K. Schum.                    |
| 2Baudes | <i>Bauhinia deserti</i> (Britton & Rose) Lundell                          | 5Cenvir  | <i>Centrosema virginianum</i> (L.) Benth.                         |
| 2Baudiv | <i>Bauhinia divaricata</i> L.                                             | 5Cligui  | <i>Clitoria guianensis</i> (Aubl.) Benth.                         |
| 2Baujen | <i>Bauhinia jenningsii</i> P.G. Wilson                                    | 5Clipol  | <i>Clitoria polystachya</i> Benth.                                |
| 2Baupau | <i>Bauhinia pauletia</i> Pers.                                            | 5Colbro  | <i>Cologania broussonetii</i> (Balb.) DC.                         |
| 2Baurub | <i>Bauhinia rubeleruziana</i> Donn. Sm.                                   | 5Colpro  | <i>Cologania procumbens</i> Kunth                                 |
| 2Bauung | <i>Bauhinia unguolata</i> L.                                              | 5Coucar  | <i>Coursetia caribaea</i> (Jacq.) Lavin                           |
| 2Schher | <i>Schnella herrerae</i> Britton & Rose                                   | 5Cougla  | <i>Coursetia glandulosa</i> A. Gray                               |
| 3Cynoax | <i>Cynometra oaxacana</i> Brandegee                                       | 5Courmol | <i>Coursetia mollis</i> B.L. Rob. & Greenm.                       |
| 3Hymcou | <i>Hymenaea courbaril</i> L.                                              | 5Croaca  | <i>Crotalaria acapulcensis</i> Hook. & Arn.                       |
| 3Pelmex | <i>Peltogyne mexicana</i> Martínez                                        | 5Crocaj  | <i>Crotalaria cajanifolia</i> Kunth                               |
| 4Diagui | <i>Dialium guianense</i> (Aubl.) Sandwith                                 | 5Croeri  | <i>Crotalaria eriocarpa</i> Benth.                                |
| 5Aesame | <i>Aeschynomene americana</i> L.                                          | 5Crolon  | <i>Crotalaria longirostrata</i> Hook. & Arn.                      |
| 5Aescom | <i>Aeschynomene compacta</i> Rose                                         | 5Cromay  | <i>Crotalaria maypurensis</i> Kunth                               |
| 5Aesdea | <i>Aeschynomene deamii</i> B.L. Rob. & Bartlett                           | 5Cromic  | <i>Crotalaria micans</i> Link                                     |
| 5Aesfas | <i>Aeschynomene fascicularis</i> Schltdl. & Cham.                         | 5Cromol  | <i>Crotalaria mollicula</i> Kunth                                 |
| 5Amizyg | <i>Amicia zygomeres</i> DC.                                               | 5Cronit  | <i>Crotalaria nitens</i> Kunth                                    |
| 5Ampbra | <i>Amphicarpaea bracteata</i> (L.) Fernald                                | 5Cropol  | <i>Crotalaria polyphylla</i> L. Riley                             |
| 5Andgal | <i>Andira galeottiana</i> Standl.                                         | 5Cropum  | <i>Crotalaria pumila</i> Ortega                                   |
| 5Andine | <i>Andira inermis</i> (W. Wright) Kunth ex DC.                            | 5Croque  | <i>Crotalaria quercetorum</i> Brandegee                           |
| 5Apopan | <i>Apoplanesia paniculata</i> C. Presl                                    | 5Crorot  | <i>Crotalaria rotundifolia</i> J.F. Gmel.                         |
| 5Astmol | <i>Astragalus mollissimus</i> Torr.                                       | 5Crosag  | <i>Crotalaria sagittalis</i> L.                                   |
| 5Astpri | <i>Astragalus pringlei</i> S. Watson                                      | 5Dalbic  | <i>Dalea bicolor</i> Humb. & Bonpl. ex Willd.                     |
| 5Atechi | <i>Ateleia chiangii</i> J. Linares                                        | 5Dalbra  | <i>Dalea brachystachya</i> A. Gray                                |
| 5Atepte | <i>Ateleia pterocarpa</i> Moc. & Sessé ex D. Dietr.                       | 5Dbrown  | <i>Dalbergia brownei</i> (Jacq.) Schinz                           |
| 5Broala | <i>Brongniartia alamosana</i> Rydb.                                       | 5Dalcae  | <i>Dalea caeciliae</i> Harms                                      |
|         |                                                                           | 5Dalcar  | <i>Dalea carthagenensis</i> (Jacq.) J.F. Macbr.                   |

|          |                                                              |          |                                                            |
|----------|--------------------------------------------------------------|----------|------------------------------------------------------------|
| 5Dalcli  | <i>Dalea cliffortiana</i> Willd.                             | 5Desstr  | <i>Desmodium strobilaceum</i> Schltdl.                     |
| 5Dconge  | <i>Dalbergia congestiflora</i> Pittier                       | 5Destor  | <i>Desmodium tortuosum</i> (Sw.) DC.                       |
| 5Dcubil  | <i>Dalbergia cubilquitzensis</i> (Donn. Sm.) Pittier         | 5Desvol  | <i>Desmodium volubile</i> (Schindl.) B.G. Schub. & McVaugh |
| 5Dalfol  | <i>Dalea foliolosa</i> (Aiton) Barneby                       | 5Dipame  | <i>Diphysa americana</i> (Mill.) M. Sousa                  |
| 5Dglabr  | <i>Dalbergia glabra</i> (Mill.) Standl.                      | 5Dipcar  | <i>Diphysa carthagenensis</i> Jacq.                        |
| 5Dglome  | <i>Dalbergia glomerata</i> Hemsl.                            | 5Dipflo  | <i>Diphysa floribunda</i> Peyr.                            |
| 5Dgrana  | <i>Dalbergia granadillo</i> Pittier                          | 5Dippub  | <i>Diphysa puberulenta</i> Rydb.                           |
| 5Dallep  | <i>Dalea leporina</i> (Aiton) Bullock                        | 5Dippun  | <i>Diphysa punctata</i> Rydb.                              |
| 5Dallept | <i>Dalea leptostachya</i> DC.                                | 5Diprac  | <i>Diphysa racemosa</i> Rose                               |
| 5Dalleu  | <i>Dalea leucosericea</i> (Rydb.) Standl. & Steyerm.         | 5Dipsub  | <i>Diphysa suberosa</i> S. Watson                          |
| 5Dalleuc | <i>Dalea leucostachya</i> A. Gray                            | 5Dipyuc  | <i>Diphysa yucatanensis</i> A.M. Hanan & M. Sousa          |
| 5Dallut  | <i>Dalea lutea</i> (Cav.) Willd.                             | 5Dusmex  | <i>Dussia mexicana</i> (Standl.) Harms                     |
| 5Dalpec  | <i>Dalea pectinata</i> Kunth                                 | 5Eridif  | <i>Eriosema diffusum</i> (Kunth) G. Don                    |
| 5Dalpro  | <i>Dalea prostrata</i> Ortega                                | 5Eridif  | <i>Eriosema grandiflorum</i> (Schltdl. & Cham.) G. Don     |
| 5Dalsca  | <i>Dalea scandens</i> (Mill.) R.T. Clausen                   | 5Erimul  | <i>Eriosema multiflorum</i> B.L. Rob. ex Pringle           |
| 5Daltho  | <i>Dalea thouinii</i> Schrank                                | 5Eryame  | <i>Erythrina americana</i> Mill.                           |
| 5Daltom  | <i>Dalea tomentosa</i> (Cav.) Willd.                         | 5Eryber  | <i>Erythrina berenices</i> Krukoff & Barneby               |
| 5Dtucur  | <i>Dalbergia tucurensis</i> Donn. Sm.                        | 5Erybert | <i>Erythrina berteroa</i> Urb.                             |
| 5Dpaloe  | <i>Dalbergia palo-escrito</i> Rzed. & Guridi-Gómez           | 5Erybre  | <i>Erythrina breviflora</i> DC.                            |
| 5Dalver  | <i>Dalea versicolor</i> Zucc.                                | 5Erycar  | <i>Erythrina caribaea</i> Krukoff & Barneby                |
| 5Dersec  | <i>Dermatophyllum secundiflorum</i> (Ortega) Gandhi & Reveal | 5Erychi  | <i>Erythrina chiapasana</i> Krukoff                        |
| 5Desaff  | <i>Desmodium affine</i> Schltdl.                             | 5Erycor  | <i>Erythrina coralloides</i> DC.                           |
| 5Desamp  | <i>Desmodium amplifolium</i> Hemsl.                          | 5Eryfla  | <i>Erythrina flabelliformis</i> Kearney                    |
| 5Desapa  | <i>Desmodium aparines</i> (Link) DC.                         | 5Eryfol  | <i>Erythrina folkersii</i> Krukoff & Moldenke              |
| 5Desaxi  | <i>Desmodium axillare</i> (Sw.) DC.                          | 5Erygol  | <i>Erythrina goldmanii</i> Standl.                         |
| 5Descar  | <i>Desmodium caripense</i> (Kunth) G. Don                    | 5Eryher  | <i>Erythrina herbacea</i> L.                               |
| 5Desgla  | <i>Desmodium glabrum</i> (Mill.) DC.                         | 5Erylan  | <i>Erythrina lanata</i> Rose                               |
| 5Desgra  | <i>Desmodium grahamii</i> A. Gray                            | 5Erymex  | <i>Erythrina mexicana</i> Krukoff                          |
| 5Deshar  | <i>Desmodium hartwegianum</i> Hemsl.                         | 5Eryoli  | <i>Erythrina oliviae</i> Krukoff                           |
| 5Desmoin | <i>Desmodium intortum</i> (Mill.) Urb.                       | 5Erysta  | <i>Erythrina standleyana</i> Krukoff                       |
| 5Desmac  | <i>Desmodium macrodesmum</i> (S.F. Blake) Standl. & Steyerm. | 5Eysade  | <i>Eysenhardtia adenostylis</i> Baill.                     |
| 5Desmax  | <i>Desmodium maxonii</i> (Standl.) Standl.                   | 5Eysbye  | <i>Eysenhardtia bye</i> Cruz Durán & M. Sousa              |
| 5Desmol  | <i>Desmodium molliculum</i> (Kunth) DC.                      | 5Eysoff  | <i>Eysenhardtia officinalis</i> Cruz Durán & M. Sousa      |
| 5Desneo  | <i>Desmodium neomexicanum</i> A. Gray                        | 5Eysort  | <i>Eysenhardtia orthocarpa</i> (A. Gray) S. Watson         |
| 5Desnic  | <i>Desmodium nicaragüense</i> Oerst.                         | 5Eyspla  | <i>Eysenhardtia platycarpa</i> Pennell & Saff.             |
| 5Desorb  | <i>Desmodium orbiculare</i> Schltdl.                         | 5Eyspol  | <i>Eysenhardtia polystachya</i> (Ortega) Sarg.             |
| 5Despal  | <i>Desmodium palmeri</i> Hemsl.                              | 5Eyspun  | <i>Eysenhardtia punctata</i> Pennell                       |
| 5Despli  | <i>Desmodium plicatum</i> Schltdl. & Cham.                   | 5Eyssch  | <i>Eysenhardtia schizocalyx</i> Pennell                    |
| 5Despre  | <i>Desmodium prehensile</i> Schltdl.                         | 5Eystex  | <i>Eysenhardtia texana</i> Scheele                         |
| 5Despro  | <i>Desmodium procumbens</i> (Mill.) Hitchc.                  | 5Galaca  | <i>Galactia acapulcensis</i> Rose                          |
| 5Desser  | <i>Desmodium sericophyllum</i> Schltdl.                      | 5Galbra  | <i>Galactia brachystachys</i> Benth.                       |

|         |                                                                   |          |                                                                 |
|---------|-------------------------------------------------------------------|----------|-----------------------------------------------------------------|
| 5Galdis | <i>Galactia discolor</i> Donn. Sm.                                | 5Lonseri | <i>Lonchocarpus sericeus</i> (Poir.) Kunth ex DC.               |
| 5Galspi | <i>Galactia spiciformis</i> Torr. & A. Gray                       | 5Lonpit  | <i>Lonchocarpus pittieri</i> M. Sousa                           |
| 5Galstr | <i>Galactia striata</i> (Jacq.) Urb.                              | 5Lonrob  | <i>Lonchocarpus robustus</i> Pittier                            |
| 5Glimac | <i>Gliricidia maculata</i> (Kunth) Kunth ex Walp.                 | 5Lonrug  | <i>Lonchocarpus rugosus</i> Benth.                              |
| 5Glisep | <i>Gliricidia sepium</i> (Jacq.) Kunth ex Walp.                   | 5Lonsch  | <i>Lonchocarpus schiedeanus</i> (Schltdl.) Harms                |
| 5Harfor | <i>Harpalyce formosa</i> DC.                                      | 5Lonschu | <i>Lonchocarpus schubertiae</i> M. Sousa                        |
| 5Harmex | <i>Harpalyce mexicana</i> Rose                                    | 5Lonver  | <i>Lonchocarpus verrucosus</i> M. Sousa                         |
| 5Hellin | <i>Helicotropis linearis</i> (Kunth) A. Delgado                   | 5Lonxuu  | <i>Lonchocarpus xuul</i> Lundell                                |
| 5Helspe | <i>Helicotropis spectabilis</i> (Standl.) A. Delgado              | 5Lonyuc  | <i>Lonchocarpus yucatanensis</i> Pittier                        |
| 5Helste | <i>Helicotropis stenoloba</i> (Standl.) A. Delgado                | 5Lupcam  | <i>Lupinus campestris</i> Cham. & Schltdl.                      |
| 5Indcon | <i>Indigofera konzattii</i> Rose                                  | 5Lupele  | <i>Lupinus elegans</i> Kunth                                    |
| 5Indjal | <i>Indigofera jaliscensis</i> Rose                                | 5Lupmex  | <i>Lupinus mexicanus</i> Cerv. ex Lag.                          |
| 5Indjam | <i>Indigofera jamaicensis</i> Spreng.                             | 5Lupmon  | <i>Lupinus montanus</i> Kunth                                   |
| 5Indles | <i>Indigofera lespedezioides</i> Kunth                            | 5Lupspl  | <i>Lupinus splendens</i> Rose                                   |
| 5Indmic | <i>Indigofera microcarpa</i> Desv.                                | 5Lupunc  | <i>Lupinus uncinatus</i> Schltdl.                               |
| 5Indmin | <i>Indigofera miniata</i> Ortega                                  | 5Matrop  | <i>Macroptilium atropurpureum</i> (DC.) Urb.                    |
| 5Indpal | <i>Indigofera palmeri</i> S. Watson                               | 5Macflo  | <i>Machaerium floribundum</i> Benth.                            |
| 5Indsuf | <i>Indigofera suffruticosa</i> Mill.                              |          | <i>Macroptilium gibbosifolium</i> (Ortega) A. Delgado           |
| 5Indthi | <i>Indigofera thibaudiana</i> DC.                                 | 5Mgibbo  |                                                                 |
| 5Lenmel | <i>Lennea melanocarpa</i> (Schltdl.) Vatke ex Harms               | 5Macisa  | <i>Machaerium isadelphum</i> (E. Mey.) Amshoff                  |
| 5Lenmod | <i>Lennea modesta</i> (Standl. & Steyerl.) Standl. & Steyerl.     | 5Mackeg  | <i>Machaerium kegelii</i> Meisn.                                |
| 5Lenvir | <i>Lennea viridiflora</i> Seem.                                   | 5Mlonge  | <i>Macroptilium longepedunculatum</i> (Mart. ex Benth.) Urb.    |
| 5Lepade | <i>Leptospron adenanthum</i> (G. Mey.) A. Delgado                 | 5Macrip  | <i>Machaerium riparium</i> Brandege                             |
|         | <i>Leptolobium panamense</i> (Benth.) Sch. Rodr. & A.M.G. Azevedo | 5Mdiffu  | <i>Marina diffusa</i> (Moric.) Barneby                          |
| 5Lpanam |                                                                   | 5Mdivar  | <i>Marina divaricata</i> (Benth.) Barneby                       |
| 5Lonacu | <i>Lonchocarpus acuminatus</i> (Schltdl.) M. Sousa                | 5Mgraci  | <i>Marina gracilis</i> Liebm.                                   |
| 5Lonbal | <i>Lonchocarpus balsensis</i> M. Sousa & J.C. Soto                | 5Mnegle  | <i>Marina neglecta</i> (B.L. Rob.) Barneby                      |
| 5Loncas | <i>Lonchocarpus castilloi</i> Standl.                             | 5Mscopa  | <i>Marina scopa</i> Barneby                                     |
| 5Loncau | <i>Lonchocarpus caudatus</i> Pittier                              | 5Mucarg  | <i>Mucuna argyrophylla</i> Standl.                              |
| 5Loncru | <i>Lonchocarpus cruentus</i> Lundell                              | 5Mucslo  | <i>Mucuna sloanei</i> Fawc. & Rendle                            |
| 5Lonlpe | <i>Lonchocarpus longipedunculatus</i> M. Sousa & J.C. Soto        | 5Myrfru  | <i>Myrospermum frutescens</i> Jacq.                             |
| 5Loneri | <i>Lonchocarpus eriophyllus</i> Benth.                            | 5Myrper  | <i>Myroxylon peruiferum</i> L. f.                               |
| 5Longua | <i>Lonchocarpus guatemalensis</i> Benth.                          | 5Nisbra  | <i>Nissolia brasiliensis</i> (Vogel) T.M. Moura & Fort.-Perez   |
| 5Lonher | <i>Lonchocarpus hermannii</i> M. Sousa                            | 5Nisfru  | <i>Nissolia fruticosa</i> Jacq.                                 |
| 5Lonhid | <i>Lonchocarpus hidalgensis</i> Lundell                           | 5Nismic  | <i>Nissolia microptera</i> Poir.                                |
| 5Lonhin | <i>Lonchocarpus hintonii</i> Sandwith                             | 5Nispla  | <i>Nissolia platycalyx</i> S. Watson                            |
| 5Lonhon | <i>Lonchocarpus hondurensis</i> Benth.                            |          | <i>Nissolia vicentina</i> (Ker Gawl.) T. M. Moura & Fort.-Perez |
| 5Lonhue | <i>Lonchocarpus huetamoensis</i> M. Sousa & J.C. Soto             | 5Nisvin  | <i>Olneya tesota</i> A. Gray                                    |
| 5Lonlon | <i>Lonchocarpus longistylus</i> Pittier                           | 5OIntes  |                                                                 |
| 5Lonmin | <i>Lonchocarpus minor</i> M. Sousa                                |          | <i>Orbexilum melanocarpum</i> (Benth. ex Hemsl.) Rydb.          |
| 5Lonmul | <i>Lonchocarpus multifoliolatus</i> M. Sousa                      | 5Orbmel  |                                                                 |
|         |                                                                   | 5Ormist  | <i>Ormosia isthmensis</i> Standl.                               |
|         |                                                                   | 5Ormmac  | <i>Ormosia macrocalyx</i> Ducke                                 |
|         |                                                                   | 5Ormsch  | <i>Ormosia schippii</i> Pierce ex Standl. & Steyerl.            |

|         |                                                              |          |                                                        |
|---------|--------------------------------------------------------------|----------|--------------------------------------------------------|
| 5Oxyvol | <i>Oxyrhynchus volubilis</i> Brandegee                       | 5Rhymac  | <i>Rhynchosia macrocarpa</i> Benth.                    |
| 5Pacero | <i>Pachyrhizus erosus</i> (L.) Urb.                          | 5Rhymmin | <i>Rhynchosia minima</i> (L.) DC.                      |
| 5Pedpal | <i>Pediomelum palmeri</i> (Ockendon) J.W. Grimes             | 5Rhypre  | <i>Rhynchosia precatoria</i> DC.                       |
| 5Phaacu | <i>Phaseolus acutifolius</i> A. Gray                         | 5Rhyppyr | <i>Rhynchosia pyramidalis</i> (Lam.) Urb.              |
| 5Phacoc | <i>Phaseolus coccineus</i> L.                                | 5Rhyyuc  | <i>Rhynchosia yucatanensis</i> Grear                   |
| 5Phadum | <i>Phaseolus dumosus</i> Macfad.                             | 5Sesher  | <i>Sesbania herbacea</i> (Mill.) McVaugh               |
| 5Phaesp | <i>Phaseolus esperanzae</i> Seaton                           | 5Sigele  | <i>Sigmoidotropis elegans</i> (Piper) A. Delgado       |
| 5Phafil | <i>Phaseolus filiformis</i> Benth.                           | 5Sigspe  | <i>Sigmoidotropis speciosa</i> (Kunth) A. Delgado      |
| 5Phagla | <i>Phaseolus glabellus</i> Piper                             | 5Sphcon  | <i>Sphinctospermum constrictum</i> (S. Watson) Rose    |
| 5Phalep | <i>Phaseolus leptostachyus</i> Benth.                        | 5Stycal  | <i>Stylosanthes calcicola</i> Small                    |
| 5Phalun | <i>Phaseolus lunatus</i> L.                                  | 5Stygui  | <i>Stylosanthes guianensis</i> (Aubl.) Sw.             |
| 5Phamac | <i>Phaseolus maculatus</i> Scheele                           | 5Swacub  | <i>Swartzia cubensis</i> (Britton & P. Wilson) Standl. |
| 5Phasal | <i>Phaseolus salicifolius</i> Piper                          | 5Tepcan  | <i>Tephrosia cana</i> Brandegee                        |
| 5Phavul | <i>Phaseolus vulgaris</i> L.                                 | 5Tepcin  | <i>Tephrosia cinerea</i> Ducke                         |
| 5Piscar | <i>Piscidia carthagenensis</i> Jacq.                         | 5Tepcra  | <i>Tephrosia crassifolia</i> Benth.                    |
| 5Pisgra | <i>Piscidia grandifolia</i> (Donn. Sm.) I.M. Johnst.         | 5Tepplan | <i>Tephrosia lanata</i> M. Martens & Galeotti          |
| 5Pispis | <i>Piscidia piscipula</i> (L.) Sarg.                         | 5Teplei  | <i>Tephrosia leiocarpa</i> A. Gray                     |
| 5Pladim | <i>Platymiscium dimorphandrum</i> Donn. Sm.                  | 5Tepmul  | <i>Tephrosia multifolia</i> Rose                       |
| 5Plalas | <i>Platymiscium lasiocarpum</i> Sandwith                     | 5Tepvic  | <i>Tephrosia vicioides</i> Schltdl.                    |
| 5Playuc | <i>Platymiscium yucatanum</i> Standl.                        | 5Terunc  | <i>Teramnus uncinatus</i> (L.) Sw.                     |
| 5Poipun | <i>Poiretia punctata</i> (Willd.) Desv.                      | 5Triama  | <i>Trifolium amabile</i> Kunth                         |
| 5Pteaca | <i>Pterocarpus acapulcensis</i> Rose                         | 5Vatlun  | <i>Vatairea lundellii</i> (Standl.) Killip ex Record   |
| 5Pteorb | <i>Pterocarpus orbiculatus</i> DC.                           | 5Zordip  | <i>Zornia diphylla</i> (L.) Pers.                      |
| 5Pteroh | <i>Pterocarpus rohrii</i> Vahl                               | 5Zorret  | <i>Zornia reticulata</i> Sm.                           |
| 5Ramstr | <i>Ramirezella strobilophora</i> (B.L. Rob. ex Pringle) Rose | 5Zorthy  | <i>Zornia thymifolia</i> Kunth                         |
| 5Rhyama | <i>Rhynchosia amabilis</i> Grear                             |          |                                                        |
| 5Rhylon | <i>Rhynchosia longeracemosa</i> M. Martens & Galeotti        |          |                                                        |
